# Supplementary material for: Higher Acid-Base Imbalance Associated with Respiratory Failure Could Decrease the Survival of Patients with Scrub Typhus during Intensive Care Unit Stay: A Gene Set Enrichment Analysis
Source: PubMed Central journal article supplement (PMC6832163; doi:10.3390/jcm8101580), 2019-10-02
Supplement: jcm-08-01580-s001.pdf [file jcm-08-01580-s001.pdf]

## Supplementary information

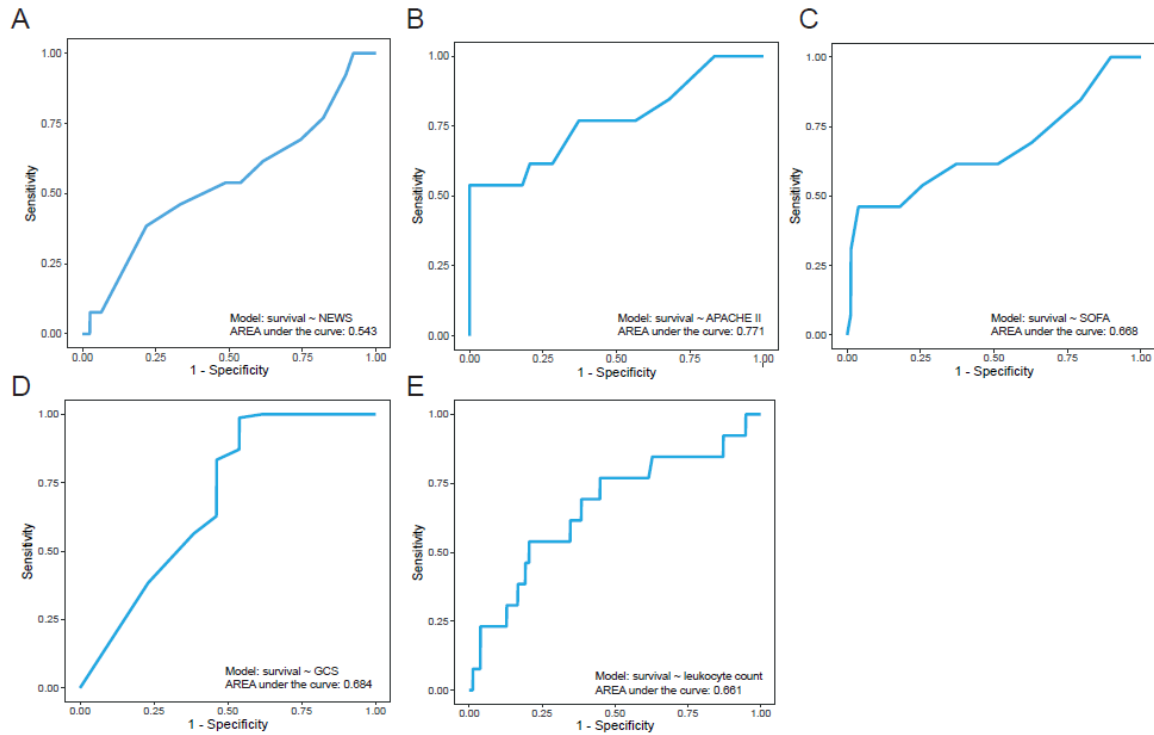

Supplementary figure 1

**Supplementary figure 1.** A Receiver operating characteristic (ROC) curve showing the statistical performance of (A) NEWS, (B) APACHE II, (C) SOFA, (D) GCS and (E) leukocyte count according to survival rate.

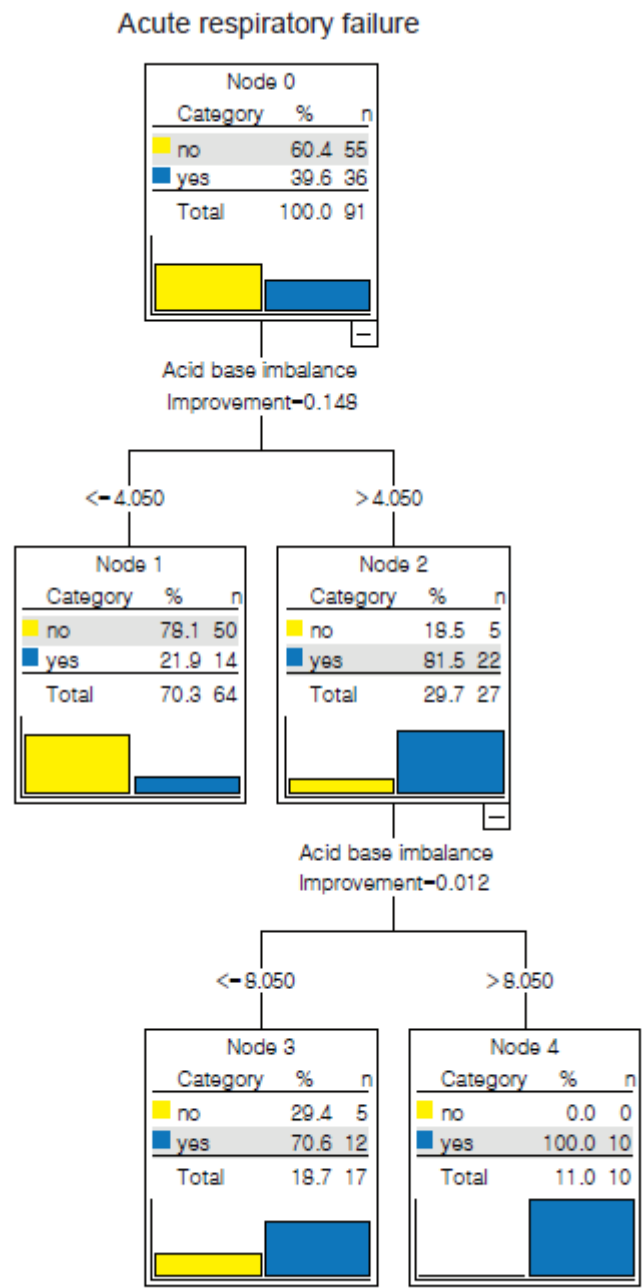

**Supplementary figure 2**

**Supplementary figure 2.** A decision tree of acid-base imbalance to predict acute respiratory failure in 91 patients with scrub typhus (yellow: absence of acute respiratory failure; blue: presence of acute respiratory failure)

**Supplementary table 1.** The criteria for admission to intensive care unit

|                                                                                                               |
|---------------------------------------------------------------------------------------------------------------|
| <b>Vital signs</b>                                                                                            |
| Pulse rate<40 times/minute or >150 times/minute                                                               |
| Systolic blood pressure<80 mmHg                                                                               |
| Diastolic blood pressure>120 mmHg                                                                             |
| Average arterial pressure<60 mmHg                                                                             |
| More than 35 breaths/min                                                                                      |
| <b>Laboratory tests</b>                                                                                       |
| Serum sodium<110 mEq/L or >170 mEq/L                                                                          |
| Serum potassium below 2.0 mEq/L or above 7.0 mEq/L                                                            |
| Arterial blood oxygen partial pressure<50 mmHg                                                                |
| Arterial pH<7.1 or >7.7                                                                                       |
| Blood glucose level>800 mg/dl                                                                                 |
| Serum calcium>15 mg/dl                                                                                        |
| Toxic doses of drugs or chemicals that may be of hemodynamic or neurological problem                          |
| <b>Radiology/Ultrasonography/Computed Tomography</b>                                                          |
| Cerebral bleeding, or subarachnoid hemorrhage with changes in consciousness or local neurological signs       |
| Hemodynamically unstable rupture of the intestines, bladder, liver, esophagus, varicose veins or uterus       |
| Aortic dissection                                                                                             |
| <b>Echocardiogram</b>                                                                                         |
| Myocardial infarction associated with complex arrhythmia, hemodynamic instability or congestive heart failure |
| Continuous ventricular tachycardia or ventricular fibrillation                                                |
| Complete atrioventricular block with hemodynamic instability                                                  |
| <b>Acute onset physical signs</b>                                                                             |
| When the pupil size is different in an unconscious patient                                                    |
| Anuria                                                                                                        |
| Airway obstruction                                                                                            |
| Coma                                                                                                          |
| Persistent convulsions                                                                                        |
| Cardiac tamponade                                                                                             |

**Supplementary table 2.** Gene sets within the top 10-ranked list related to scrub typhus (scrub typhus versus health, GSE 24247)

| NAME                                              | SIZE | ES           | NES          | NOM<br>(p-value)  | FDR<br>(q-value) | FWER<br>(p-value) |
|---------------------------------------------------|------|--------------|--------------|-------------------|------------------|-------------------|
| KEGG_RIG_I_LIKE_RECEPTOR_SIGNALING_PATHWAY        | 66   | <b>0.702</b> | <b>1.593</b> | <b>&lt; 0.001</b> | <b>0.396</b>     | 0.29              |
| KEGG_TOLL_LIKE_RECEPTOR_SIGNALING_PATHWAY         | 96   | 0.627        | 1.541        | < 0.001           | 0.358            | 0.483             |
| KEGG_APOPTOSIS                                    | 87   | 0.565        | 1.522        | < 0.001           | 0.333            | 0.64              |
| KEGG_JAK_STAT_SIGNALING_PATHWAY                   | 150  | 0.592        | 1.516        | < 0.001           | 0.269            | 0.679             |
| KEGG_NOD_LIKE_RECEPTOR_SIGNALING_PATHWAY          | 62   | <b>0.562</b> | <b>1.513</b> | <b>&lt; 0.001</b> | <b>0.221</b>     | <b>0.689</b>      |
| KEGG_LEISHMANIA_INFECTION                         | 70   | <b>0.501</b> | <b>1.504</b> | <b>&lt; 0.001</b> | <b>0.205</b>     | <b>0.733</b>      |
| KEGG_CYTOSOLIC_DNA_SENSING_PATHWAY                | 49   | 0.744        | 1.436        | 0.071             | 0.386            | 0.86              |
| KEGG_PRION_DISEASES                               | 35   | 0.546        | 1.432        | < 0.001           | 0.358            | 0.877             |
| KEGG_CYTOKINE_CYTOKINE_RECEPTOR_INTERACTION       | 257  | 0.599        | 1.427        | < 0.001           | 0.337            | 0.877             |
| KEGG_INTESTINAL_IMMUNE_NETWORK_FOR_IGA_PRODUCTION | 48   | 0.534        | 1.427        | < 0.001           | 0.304            | 0.877             |
| KEGG_RIG_I_LIKE_RECEPTOR_SIGNALING_PATHWAY        | 66   | 0.702        | 1.593        | < 0.001           | 0.396            | 0.29              |

ES: Enrichment score, NES: Normalized enrichment score, FDR: False discovery rate, NOM: Nominal p-value, FDR: False discovery rate, FWER: Family-wise error rate

**Supplementary table 3.** Gene sets within the top 10-ranked list related to scrub typhus (scrub typhus versus other infection, GSE 16463)

| NAME                                                            | SIZE | ES    | NES   | NOM (p-value) | FDR (q-value) | FWER (p-value) |
|-----------------------------------------------------------------|------|-------|-------|---------------|---------------|----------------|
| KEGG_ARACHIDONIC_ACID_METABOLISM                                | 53   | 0.551 | 1.834 | 0.002         | 0.143         | 0.105          |
| KEGG_ASTHMA                                                     | 30   | 0.656 | 1.784 | 0.010         | 0.139         | 0.172          |
| KEGG_INTESTINAL_IMMUNE_NETWORK_FOR_IGA_PRODUCTION               | 48   | 0.549 | 1.710 | 0.009         | 0.222         | 0.302          |
| KEGG_ETHER_LIPID_METABOLISM                                     | 28   | 0.486 | 1.633 | 0.006         | 0.367         | 0.494          |
| KEGG_GLUTATHIONE_METABOLISM                                     | 46   | 0.501 | 1.537 | 0.050         | 0.653         | 0.721          |
| KEGG_ALPHA_LINOLENIC_ACID_METABOLISM                            | 17   | 0.489 | 1.506 | 0.022         | 0.679         | 0.772          |
| KEGG_DRUG_METABOLISM_CYTOCHROME_P450                            | 71   | 0.404 | 1.504 | 0.046         | 0.591         | 0.779          |
| KEGG_TYPE_I_DIABETES_MELLITUS                                   | 44   | 0.462 | 1.501 | 0.051         | 0.530         | 0.786          |
| KEGG_EPITHELIAL_CELL_SIGNALING_IN_HELICOBACTER_PYLORI_INFECTION | 65   | 0.408 | 1.493 | 0.042         | 0.499         | 0.799          |
| KEGG_CYTOKINE_CYTOKINE_RECEPTOR_INTERACTION                     | 254  | 0.397 | 1.473 | 0.035         | 0.510         | 0.83           |
| KEGG_ARACHIDONIC_ACID_METABOLISM                                | 53   | 0.551 | 1.834 | 0.002         | 0.143         | 0.105          |

ES: Enrichment score, NES: Normalized enrichment score, FDR: False discovery rate, NOM: Nominal p-value, FDR: False discovery rate, FWER: Family-wise error rate
